# Supplementary material for: Ginseng-Induced Changes to Blood Vessel Dilation and the Metabolome of Rats
Source: PubMed Central journal article supplement (PMC7468881; doi:10.3390/nu12082238), 2020-07-27
Supplement: nutrients-12-02238-s001.pdf [file nutrients-12-02238-s001.pdf]

**Supplementary Table 1.** Ginsenosides component of ginseng extract

| Ginsenoside       | Amount (ppm) |
|-------------------|--------------|
| Rb1               | 1011.5       |
| Rb2               | 1124.2       |
| Rb3               | 216.7        |
| Rc                | 2024.9       |
| Rd                | 603.1        |
| Rg3               | 1615.2       |
| Rh2               | 0.0          |
| Re                | 941.6        |
| Rg1               | 873.8        |
| Rg2+Rh1           | 447.6        |
| Rh1               | 26.9         |
| Total ginsenoside | 8885.5       |

Ginsenosides were analyzed on HPLC system (Chrompass data system, JASCO, Japan) with photodiode array detector(MD-2010, JASCO) equipped with C18 column (250x4.6 mm, SunFire™, waters Corp, USA) with 1.6mL/min flow rate at 35°C. The mobile phase were water(solvent A) and acetonitrile(solvent B).

**Supplementary Table 2.** MRM mass spectrometric parameters of identified steroid hormones

|               | RT(min) | Metabolite                            | MRM mode      | collision energy (eV) |
|---------------|---------|---------------------------------------|---------------|-----------------------|
| <b>Plasma</b> | 0.62    | estradiol-3-glucuronate               | 473.3 > 200.9 | 20                    |
|               | 3.05    | estrone-3-hemisuccinate               | 371.2 > 177.2 | 20                    |
|               | 9.88    | 11a-hydroxyestradiol                  | 289.3 > 253.1 | 20                    |
|               | 14.53   | 21a-hydroxyprogesterone               | 331.3 > 313.0 | 10                    |
| <b>Urine</b>  | 0.63    | 27-hydroxycholesterol                 | 367.3 > 114.9 | 10                    |
|               | 4.17    | metandienone                          | 301.2 > 149.2 | 20                    |
|               | 5.42    | 2-hydroxyestrone-1+4-N-acetylcysteine | 448.3 > 161.9 | 20                    |
|               | 8.65    | 6-dehydroestradiol diacetate          | 355.3 > 313.4 | 20                    |
|               | 10.07   | estriol-16,17-diacetate               | 373.3 > 313.2 | 10                    |
|               | 10.33   | 2,3-dimethoxyestradiol                | 317.3 > 302.2 | 20                    |
|               | 14.15   | 5-androstenediol                      | 273.3 > 255.1 | 20                    |
|               | 16.65   | 11b-hydroxyl estradiol                | 289.3 > 106.0 | 15                    |

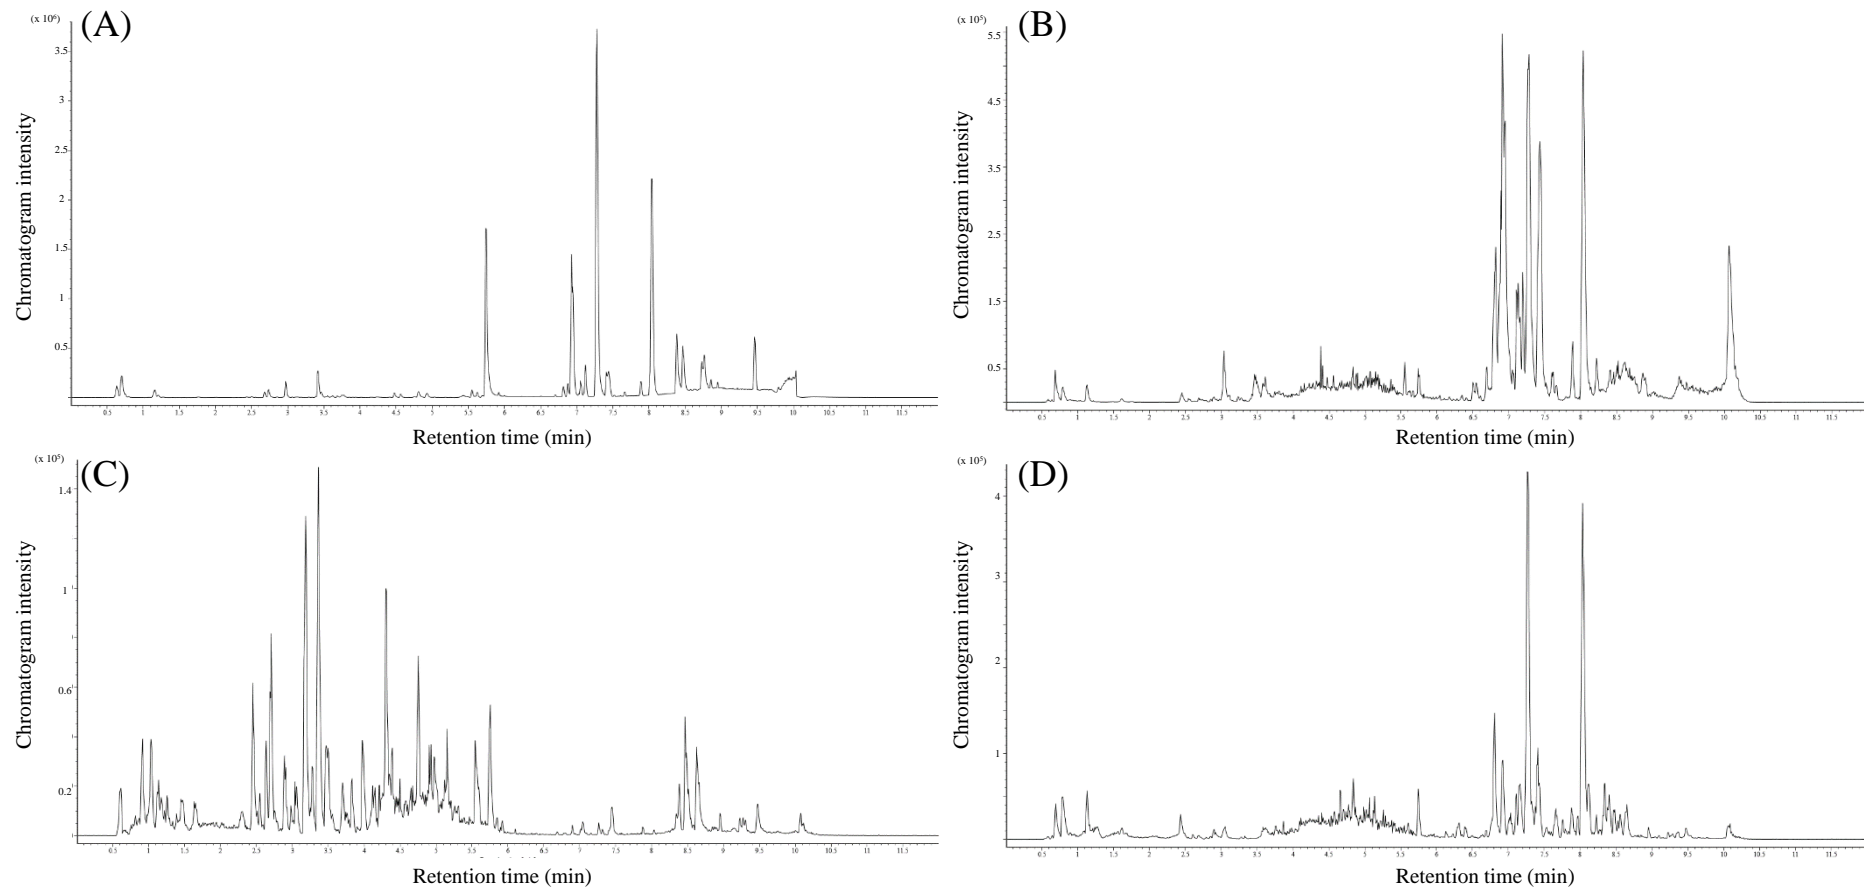

**Supplementary Figure 1.** Representative ultra-performance liquid chromatography-quadrupole-time-of-flight mass spectrometry (UPLC-Q-TOF MS) profiles of plasma (A), kidney (B), urine (C), and liver (D) of rats treated with oral administration of the ginseng extract.

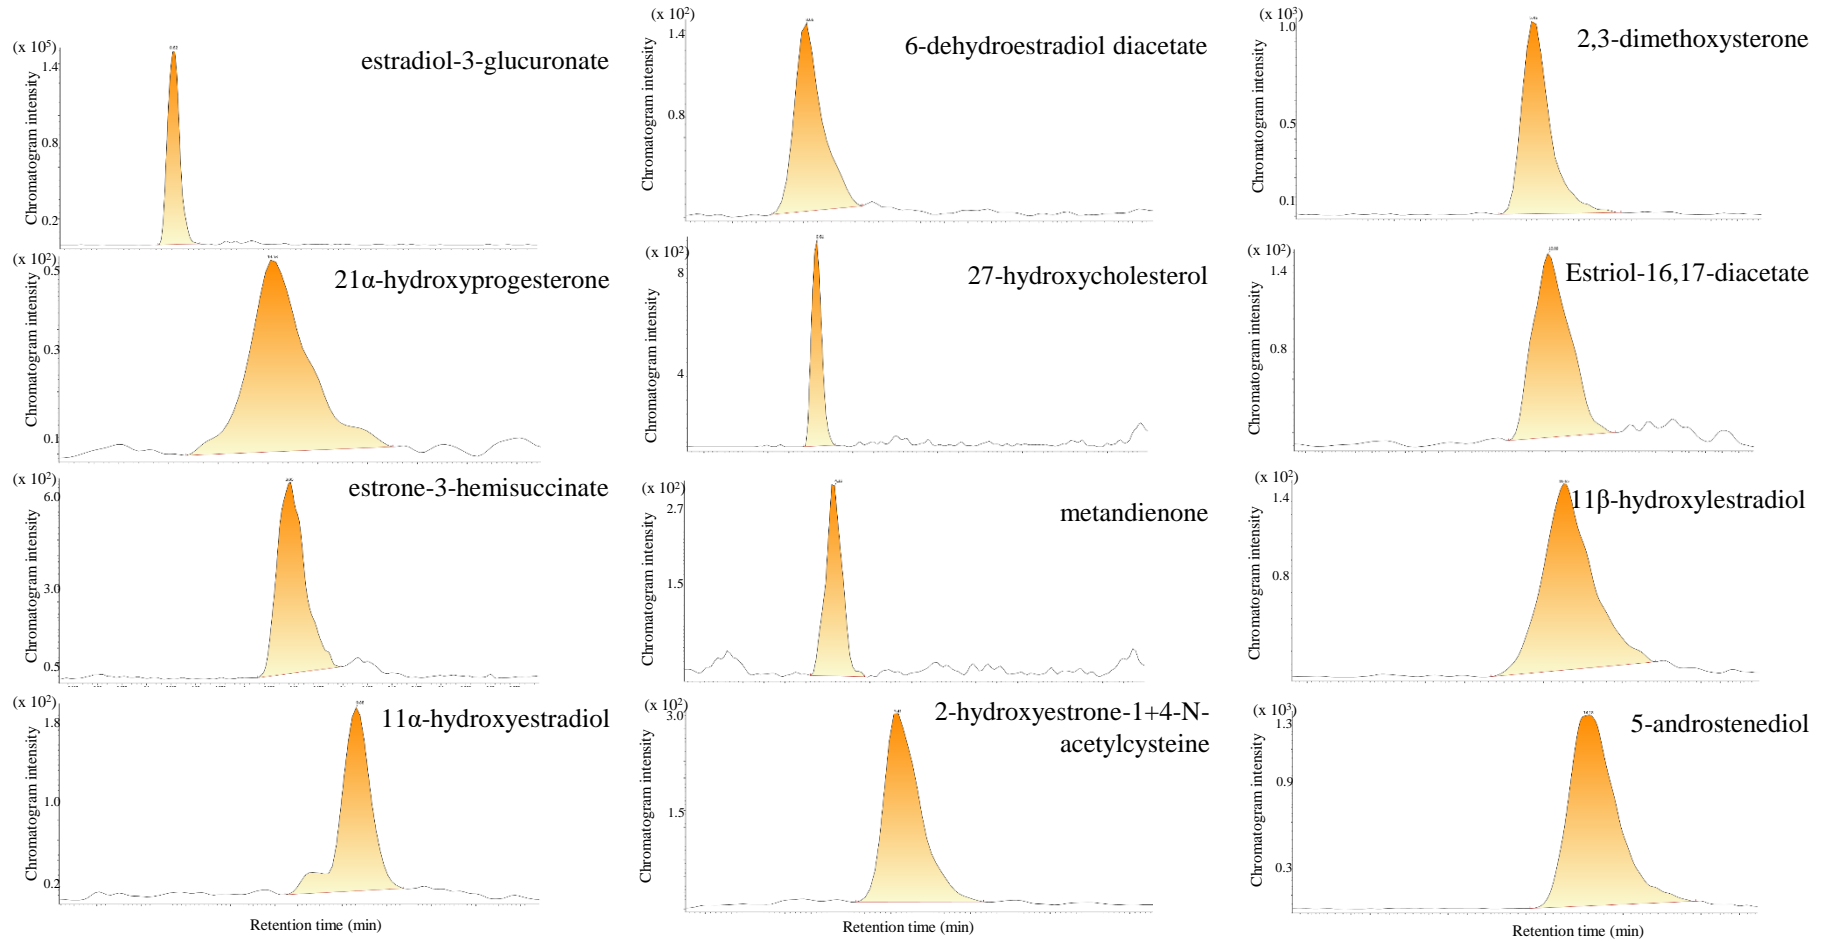

**Supplementary Figure 2.** Representative plasma and urinary steroid hormone chromatograms analyzed UPLC-Q-TOF MS with MRM mode.

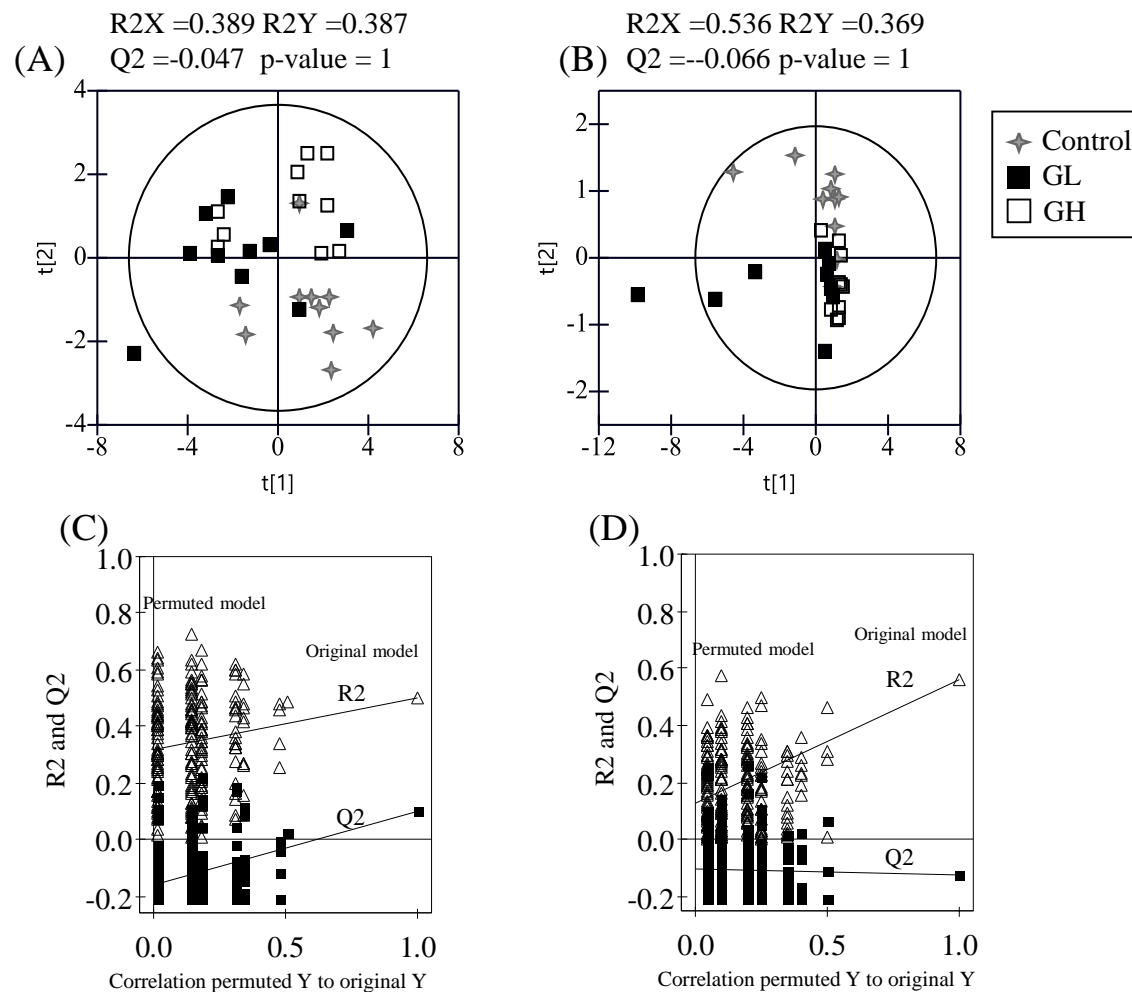

**Supplementary Figure 3.** Partial least-squares discriminant analysis (PLS-DA) score plots of urine (A) and liver (B) metabolites and their quality parameters. The quality for the PLS-DA scores are evaluated with  $R^2X$ ,  $R^2Y$ ,  $Q^2$ , and  $p$ -values and validated with cross validation by 200 permutation tests of urine (C) and liver (D).

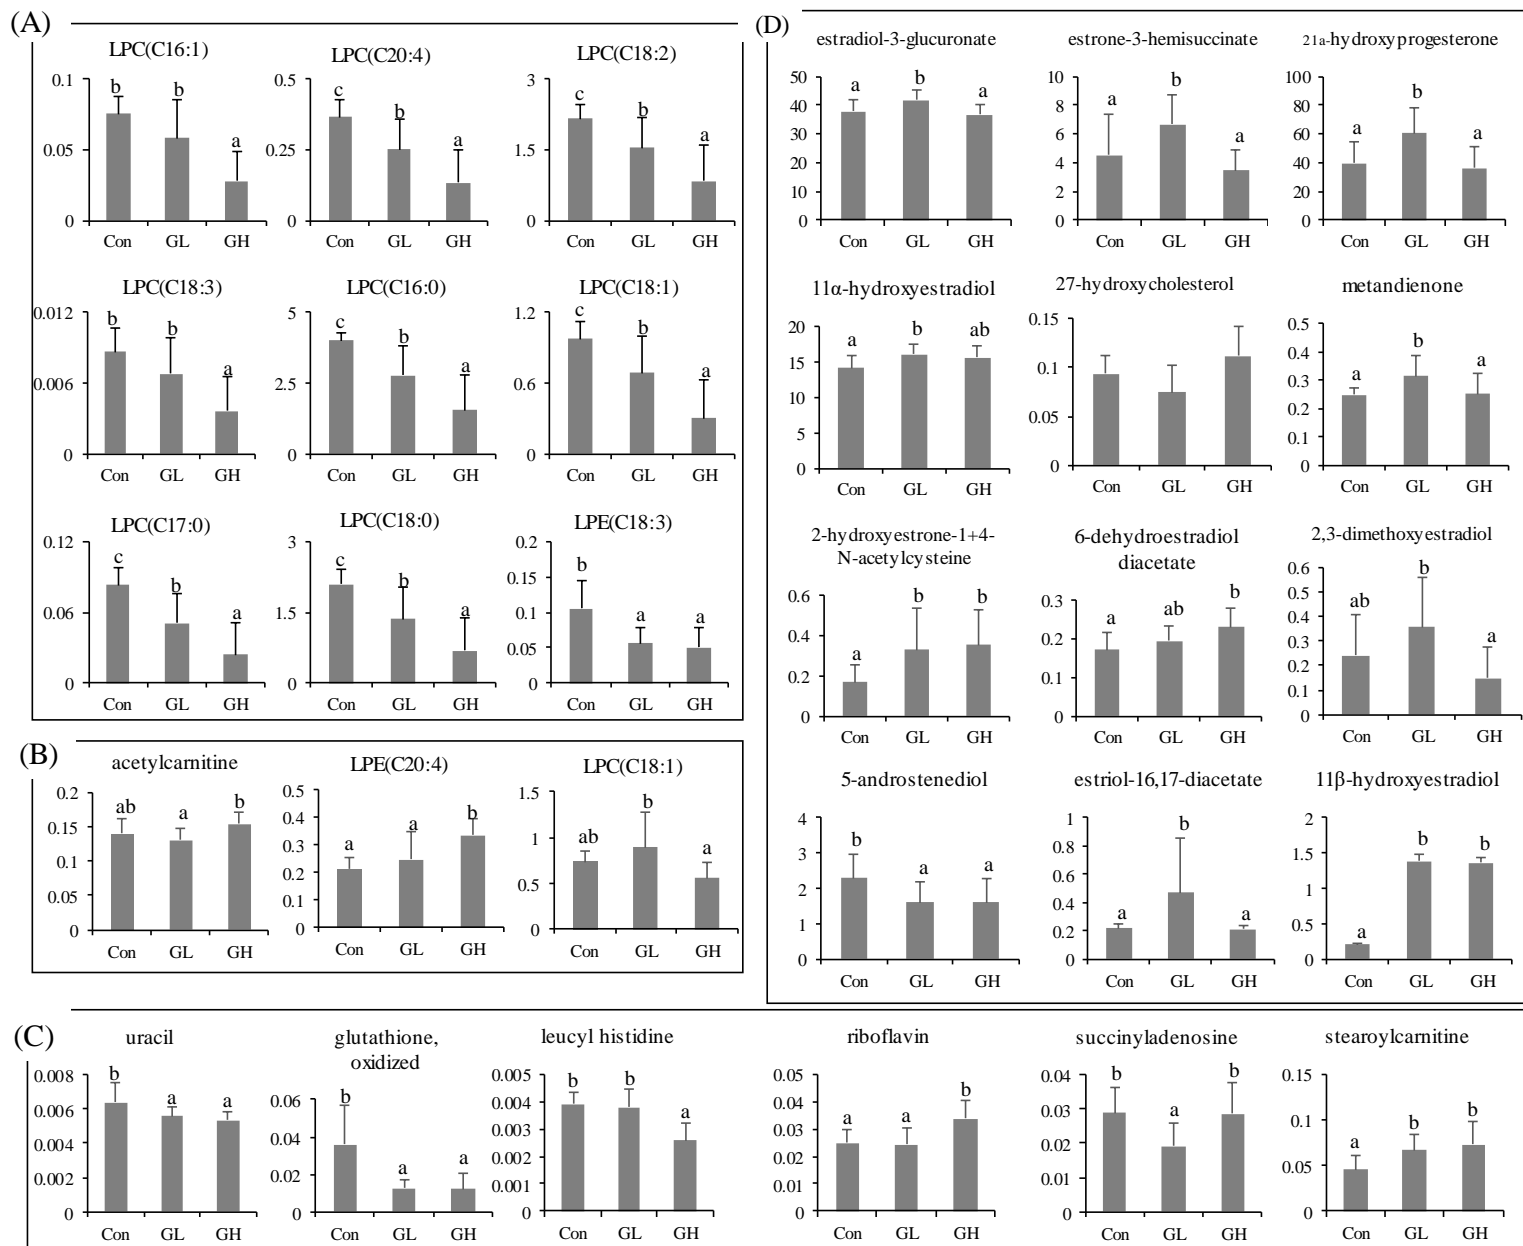

**Supplementary Figure 4.** Relative abundance of identified metabolites from plasma (A), liver (B), and kidney (C) metabolites and steroid hormones (D) from rats treated with oral administration of the ginseng extract or water. Different letters on the bars indicate significant differences at  $p < 0.05$ .

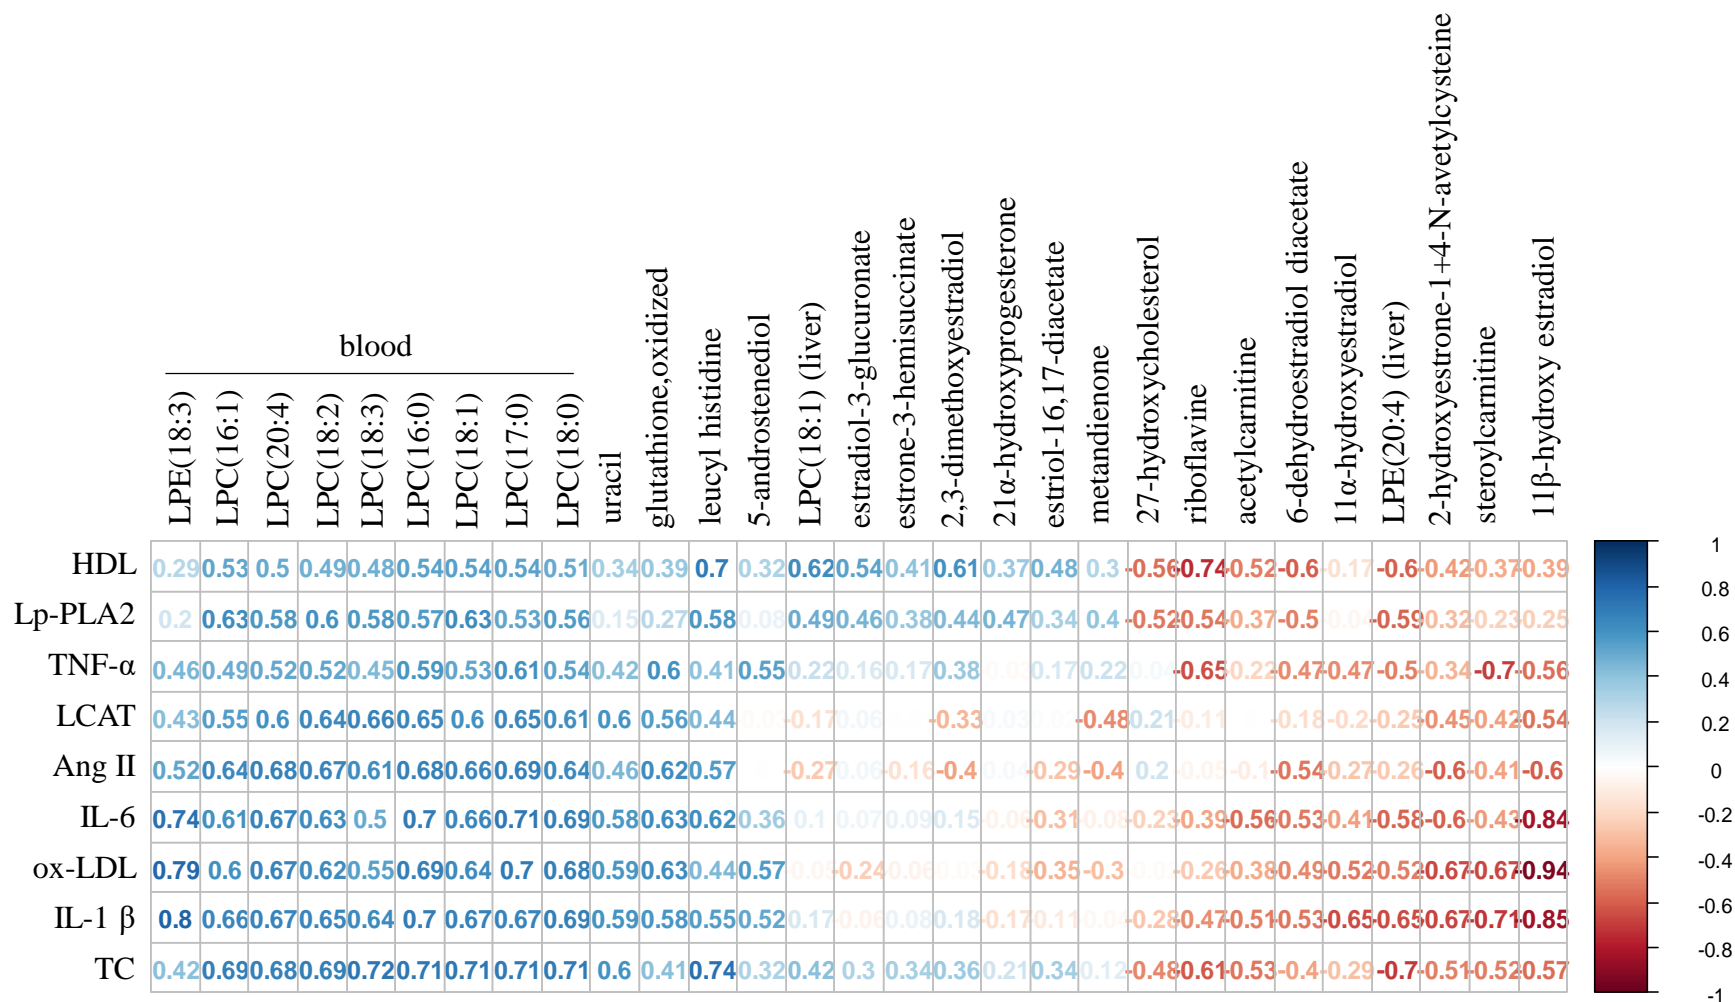

**Supplementary Figure 5.** Pearson correlation coefficients of the relationship between identified metabolites and steroid hormones and blood health-related factors. The correlation matrix was analyzed and visualized with a heat map generated with the R corrplot package. Positive correlations are shown in blue, and negative correlations are shown in red.
